# Supplementary material for: Balancing Tradeoffs in Climate-Smart Agriculture: Will Selling Carbon Credits Offset Potential Losses in the Net Yield Income of Small-Scale Soybean (Glycine max L.) Producers in the Mid-Southern United States?
Source: Atypon-hosted journal article supplement (doi:10.1287/deca.2023.0478), 2023-05-22
Supplement: deca.2023.0478.sm1.pdf [file deca.2023.0478.sm1.pdf]

## **Supporting Information 1: Conceptual Model for the Outcome of Tillage and Cover Crop actions on Downstream Trade-offs Between Yield and Carbon Credit Utility**

### **Balancing trade-offs in climate smart-agriculture: can on-farm actions store organic carbon and maximize net utility by selling carbon credits?**

This supplement contains a detailed description of our conceptual model that was designed to show how tillage and cover crop actions affect current soil conditions (abiotic and structural), downstream soil organic storage (SOC), and yield. The model was designed as a Bayesian Network (BN) and then extended to a Bayesian Decision Network (BDN) by adding nodes for actions and utility. See main text for a description of BNs and BDNs.

The conceptual model was constructed from several sub-models that represent known pathways of SOC storage in soil under different management actions. These include (1) the direct effects of actions on soil structure and abiotic conditions, (2) the indirect effects of actions on organic matter decomposition and eventual SOC, (3) the indirect effects of actions on bacterial carbon fixation potential of soils, (4) the indirect effects of actions on microbial community dynamics and function (enzyme production, gene expression, respiration, death and turnover), and (5) the indirect effects of actions on microbial pathogens and their effects on yield.

Figure S1 shows the baseline system state representing time zero in the carbon cycle (unsampled state). Figure S2 shows carbon flow through the growing season using intra- and inter- arcs within and between, respectively, five samples ( $t = 1, \dots, 5$ ). Each sample has the same nodes and intra-arcs. Inter-arcs between consecutive samples represent cyclic dynamics including organic matter decomposition, enzyme activity, carbon fixation, microbe respiration, and microbe community dynamics. Inter-arcs are orange dashed lines for all cyclic dynamics except microbe community dynamics (orange dotted lines).

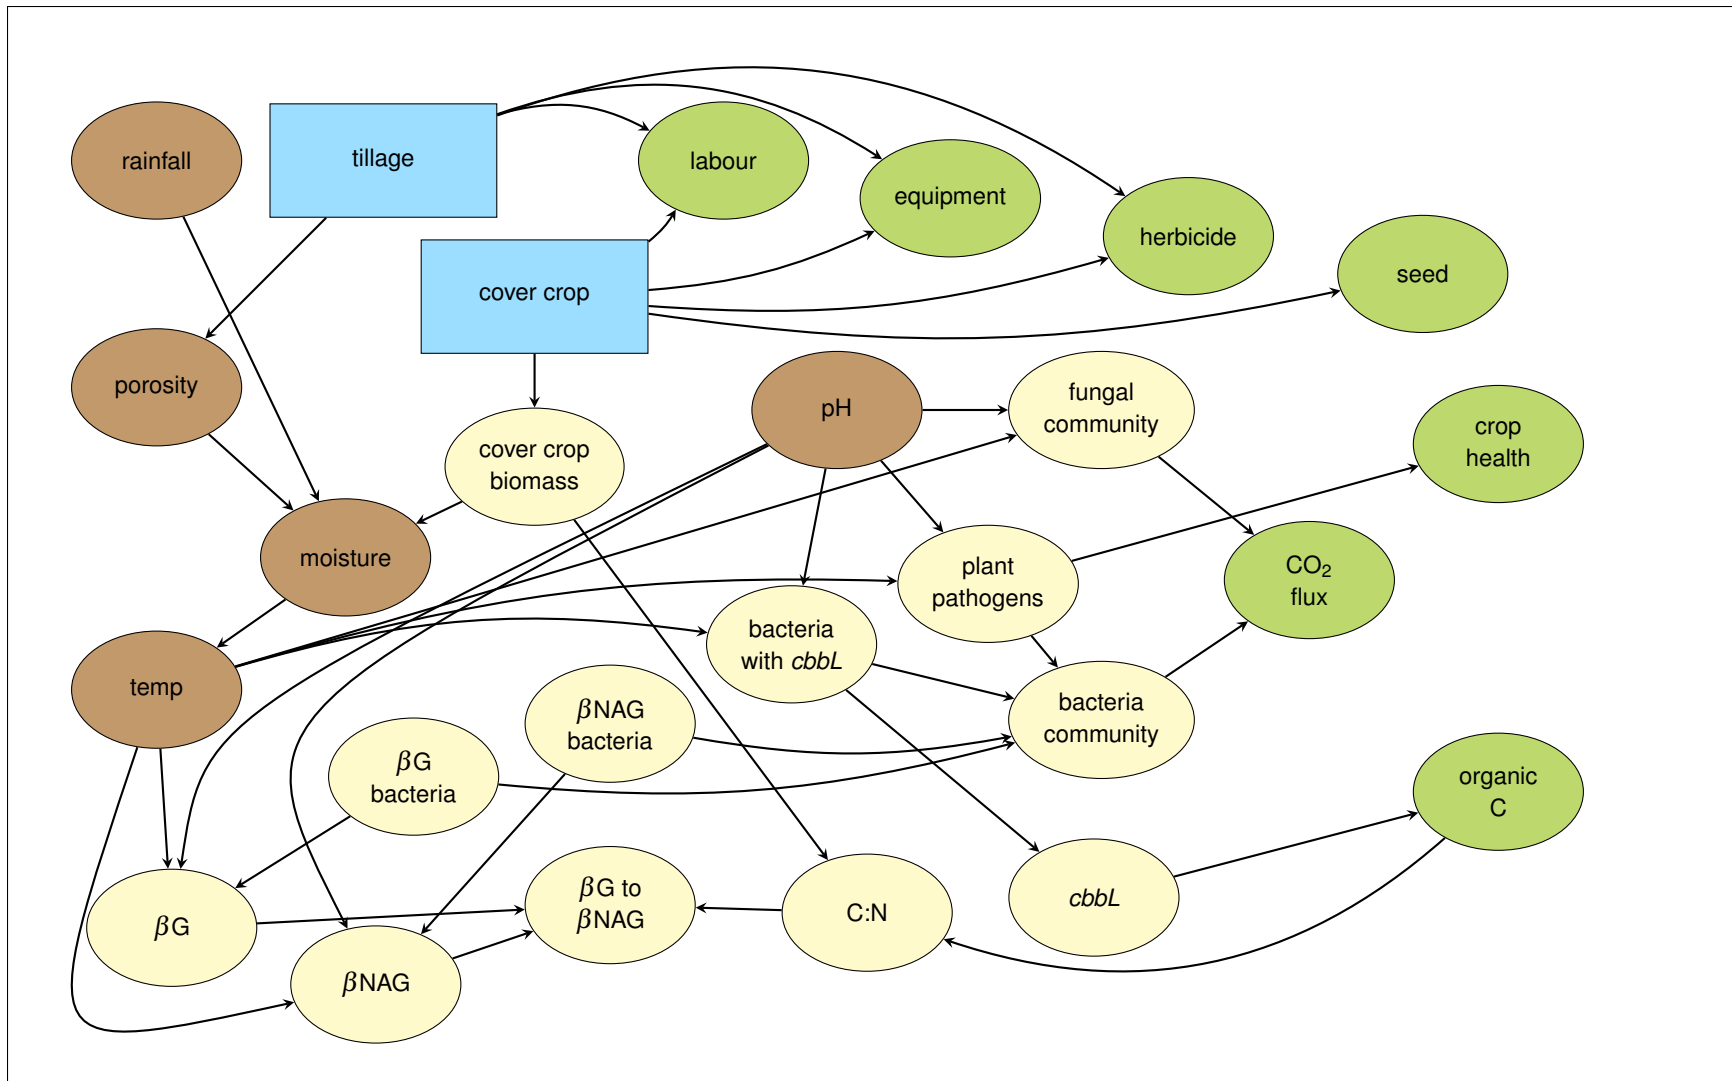

**Figure S1.1.** BDN with causal relations linking tillage and cover crop actions to expenses and soil carbon storage in the baseline system state. The field was recently tilled (or not), and cover crop residues were just placed on the soil (or not). Actions (blue) affect net yield utility (not shown) via expenses (light green) and crop yield. Actions affect carbon credit utility by changing SOC via effects on soil abiotic (brown) and biotic (yellow) conditions. Nodes coloured light green are used to calculate utility at the end of the growing season. Intra-arcs between nodes indicate conditional dependencies. See Figure S2.2 for system dynamics between samples and variable descriptions.

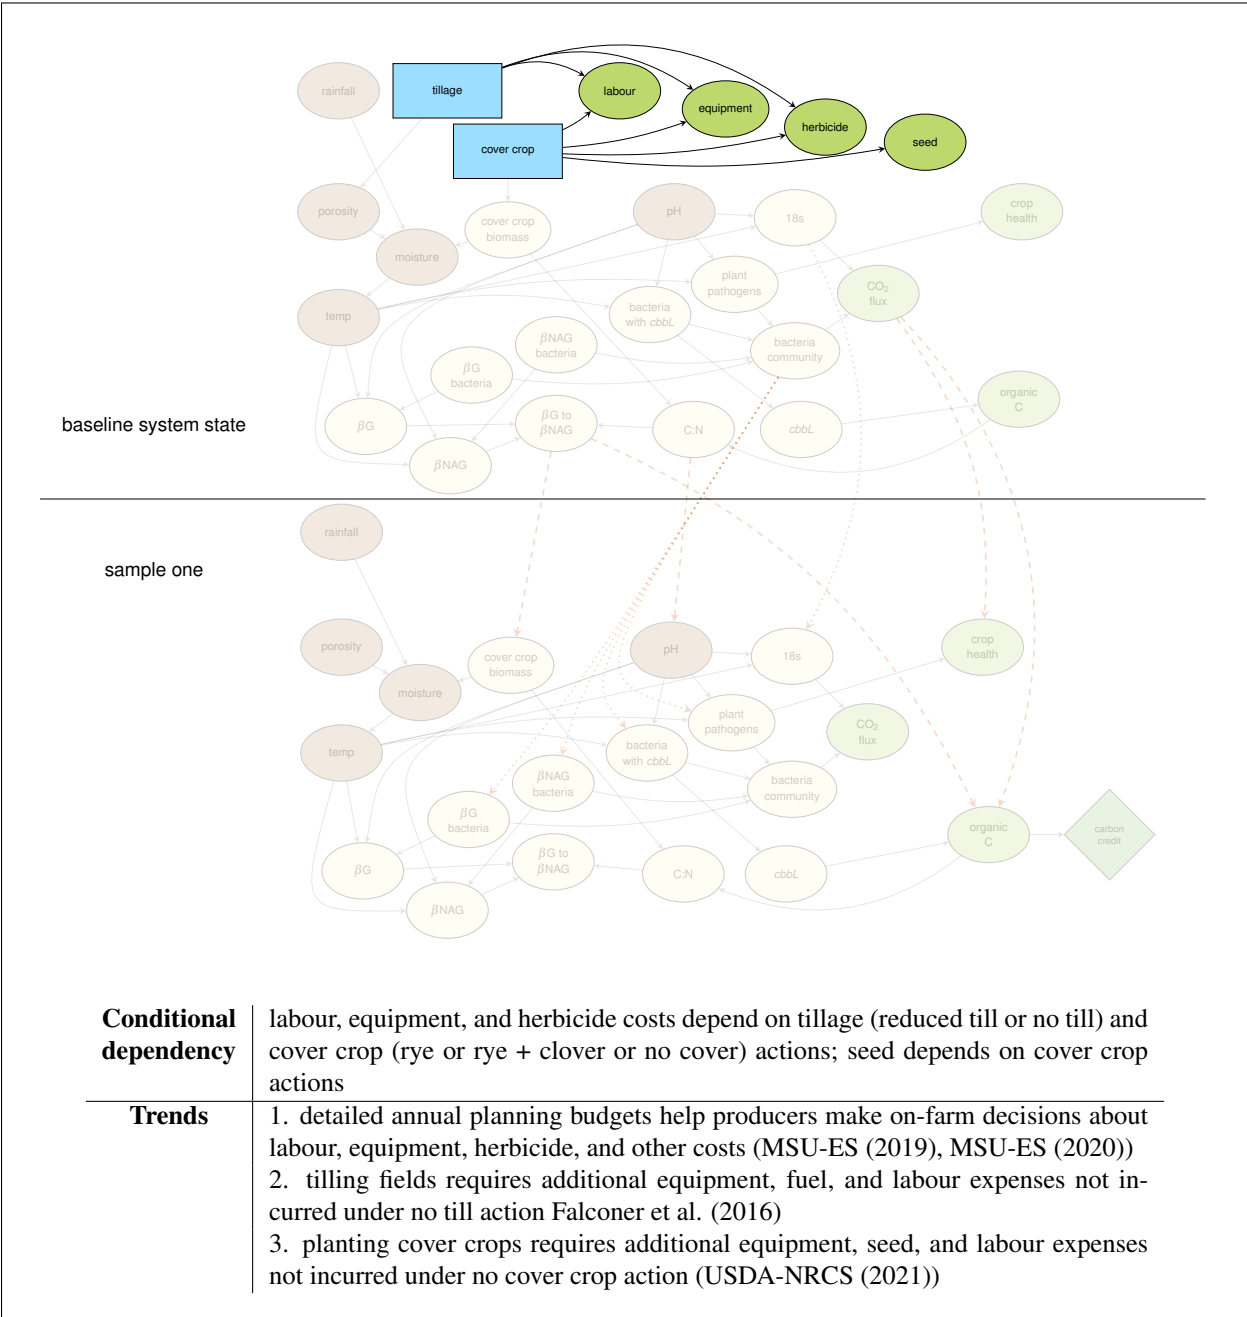

**Figure S2.2.a.** Trends and possible mechanisms underlying conditional dependencies in the conceptual BDN linking tillage and cover crop actions to net yield utility (crop health) and carbon credit utility from SOC storage.

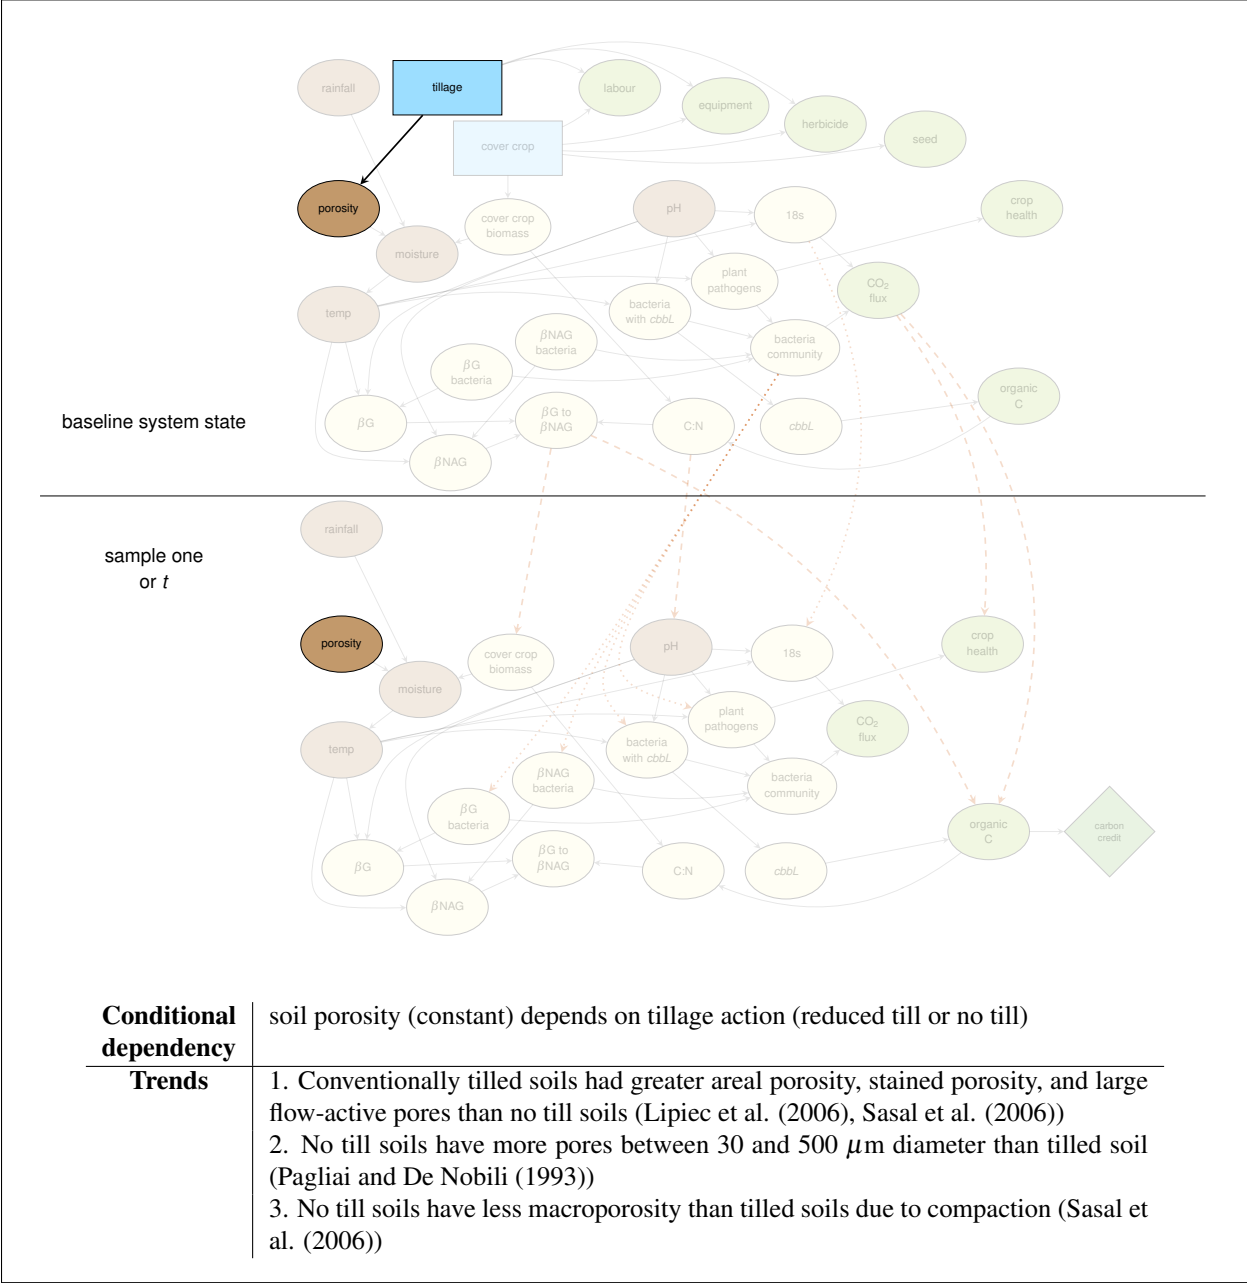

**Figure S2.2.b.** Trends and possible mechanisms underlying conditional dependencies in the conceptual BDN linking tillage and cover crop actions to net yield utility (crop health) and carbon credit utility from SOC storage. *continued*

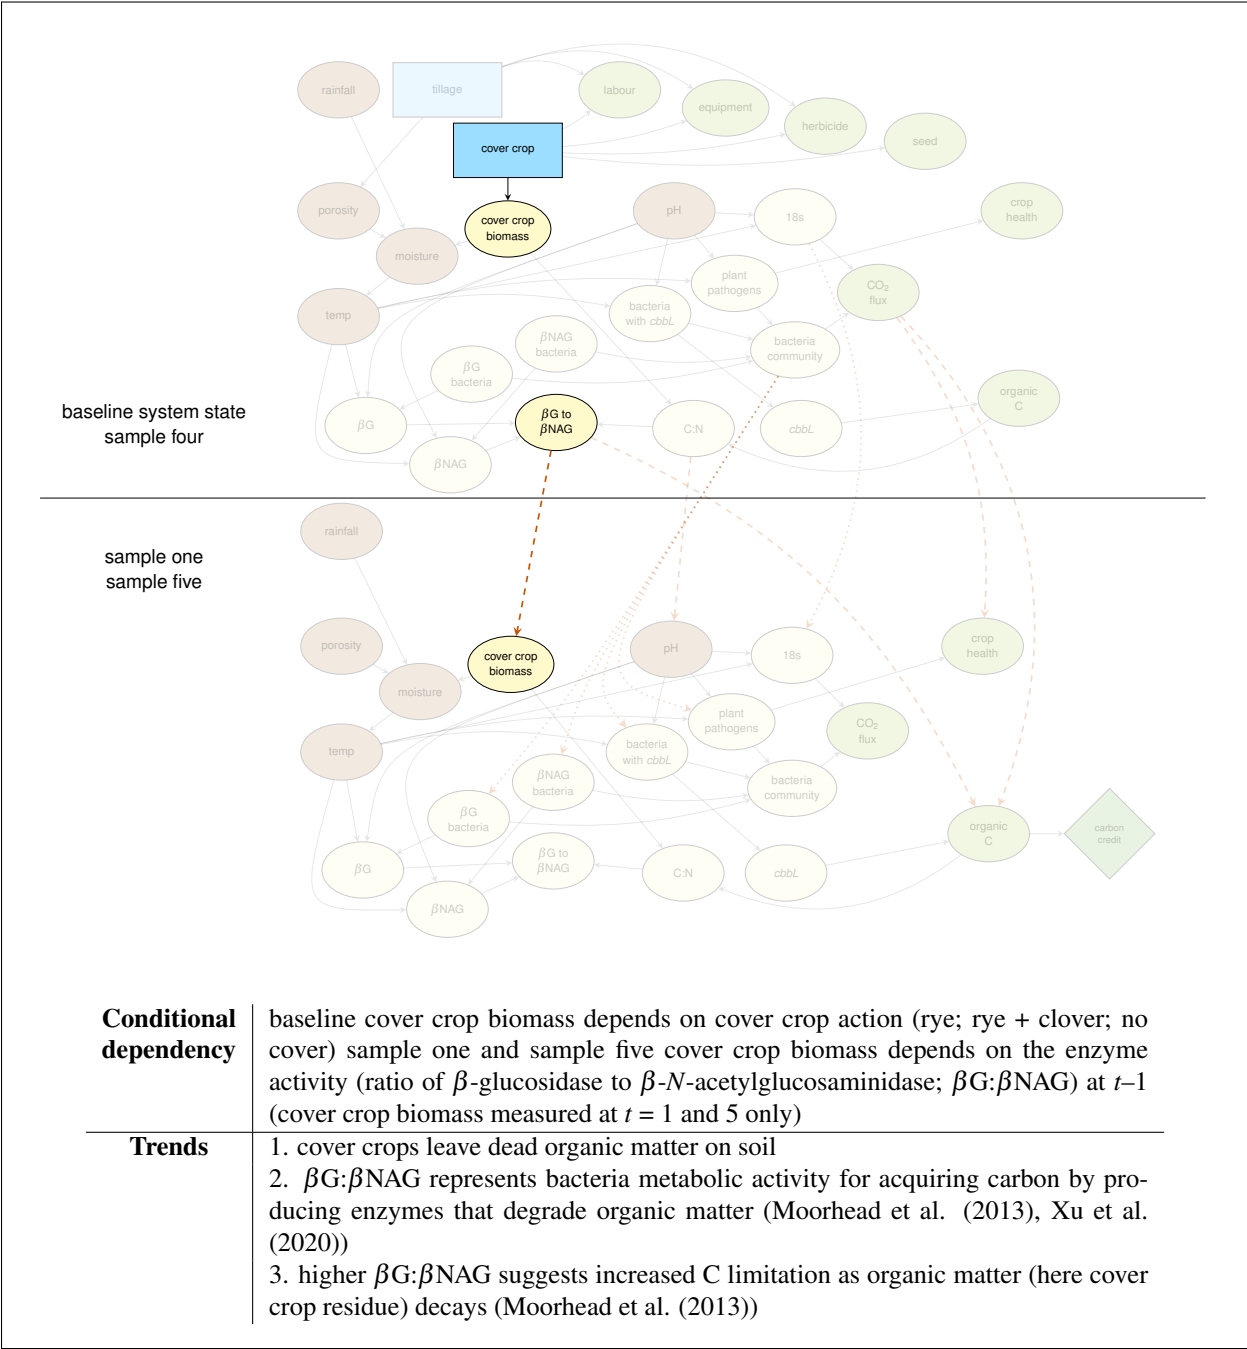

**Figure S2.2.c.** Trends and possible mechanisms underlying conditional dependencies in the conceptual BDN linking tillage and cover crop actions to net yield utility (crop health) and carbon credit utility from SOC storage. *continued*

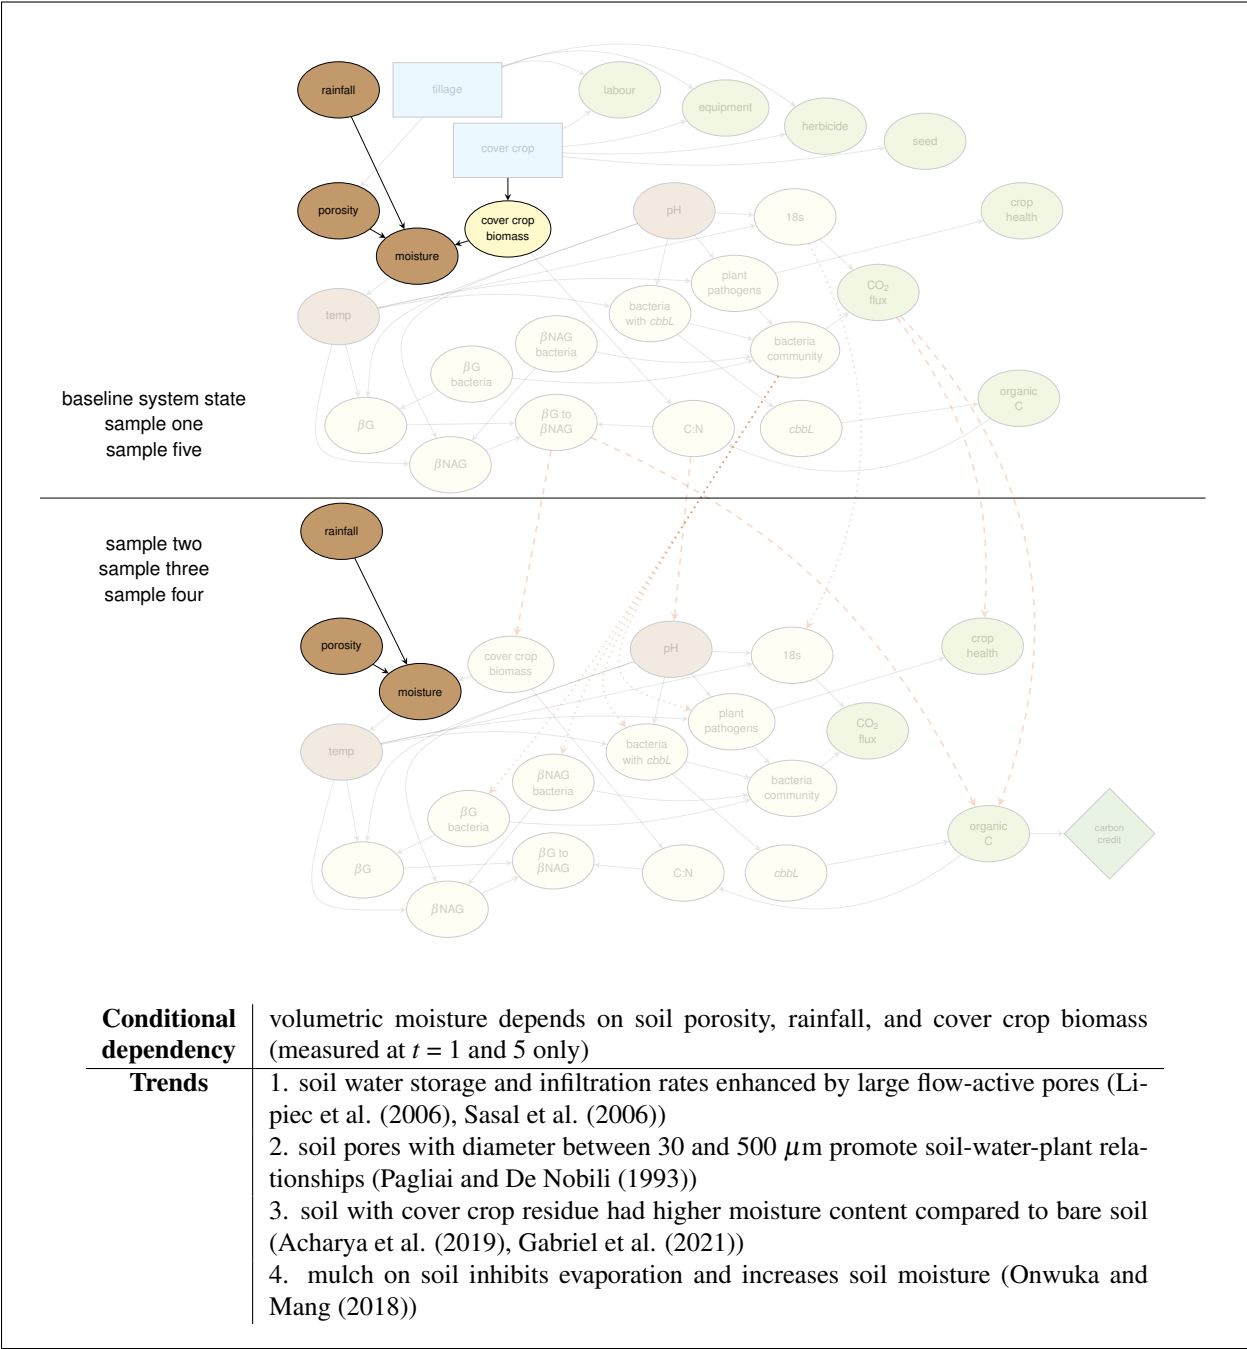

**Figure S2.2.d.** Trends and possible mechanisms underlying conditional dependencies in the conceptual BDN linking tillage and cover crop actions to net yield utility (crop health) and carbon credit utility from SOC storage. *continued*

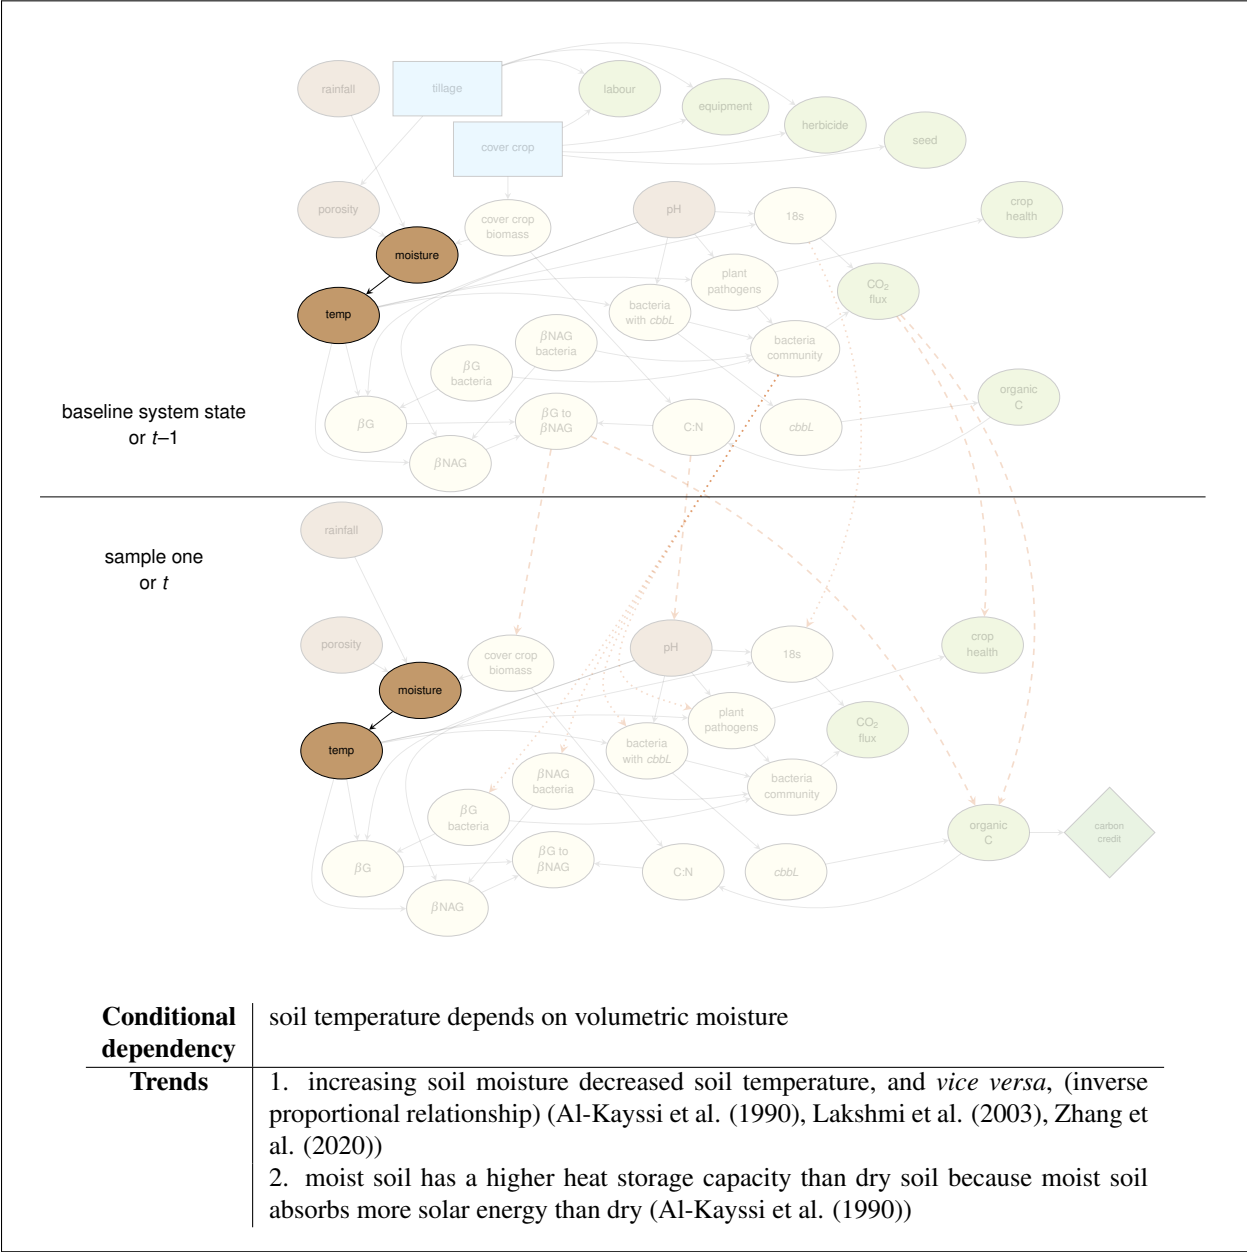

**Figure S2.2.e.** Trends and possible mechanisms underlying conditional dependencies in the conceptual BDN linking tillage and cover crop actions to net yield utility (crop health) and carbon credit utility from SOC storage. *continued*

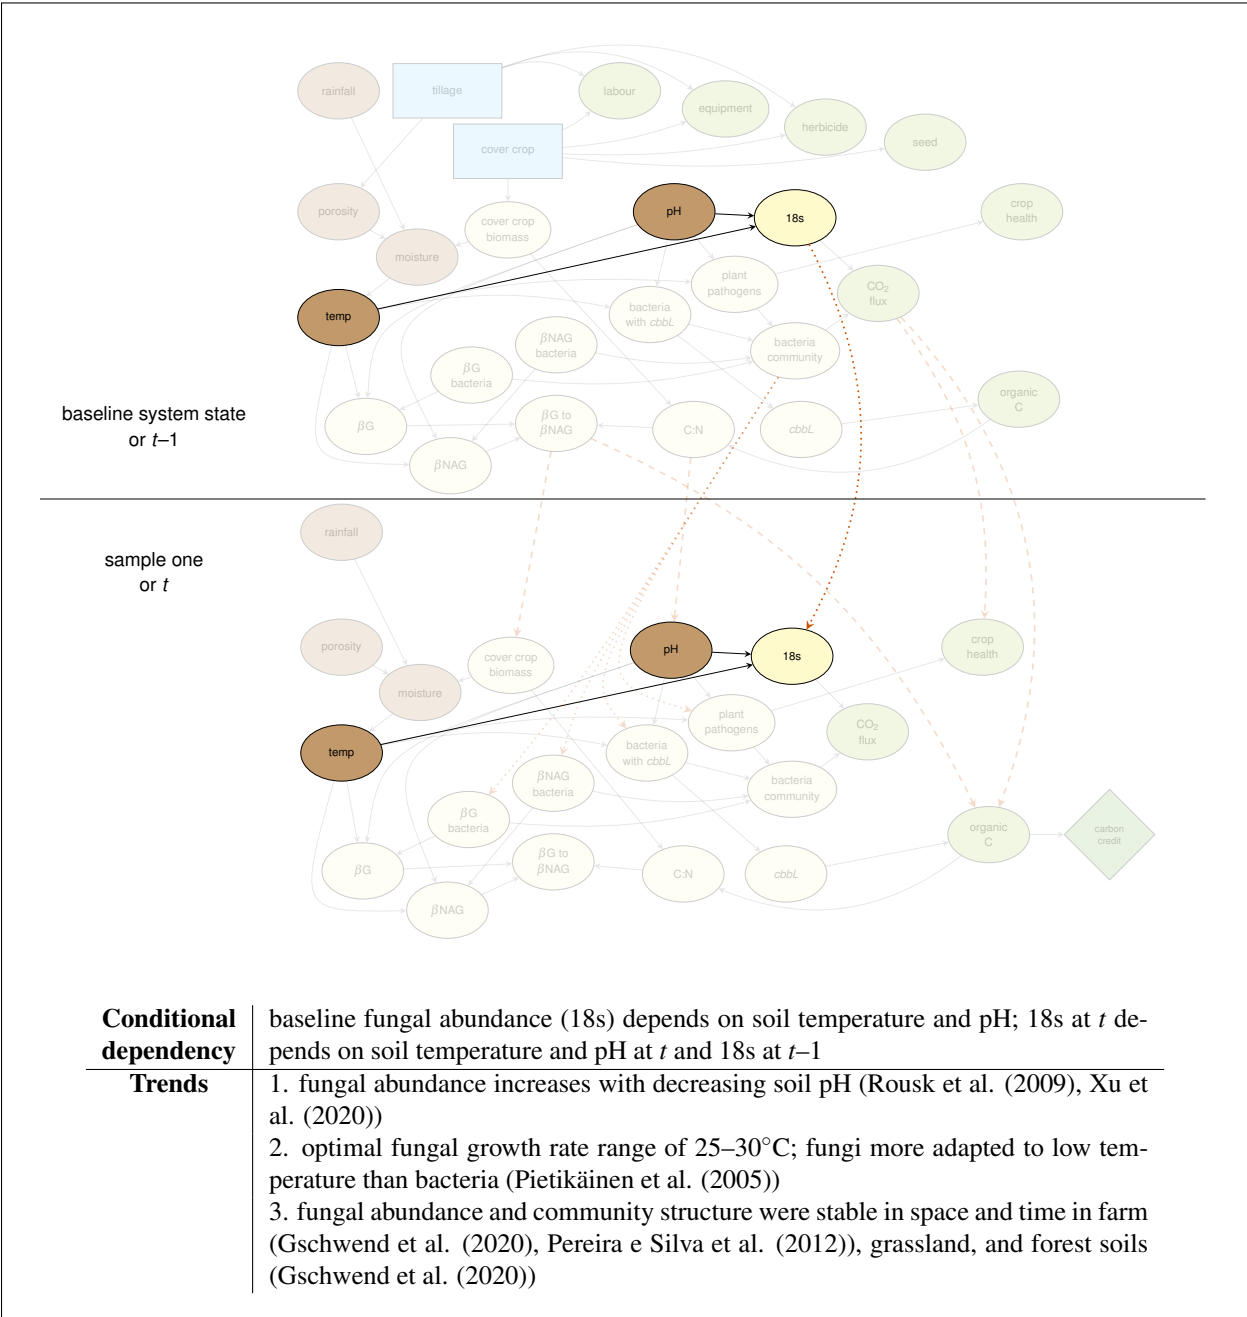

**Figure S2.2.f.** Trends and possible mechanisms underlying conditional dependencies in the conceptual BDN linking tillage and cover crop actions to net yield utility (crop health) and carbon credit utility from SOC storage. *continued*

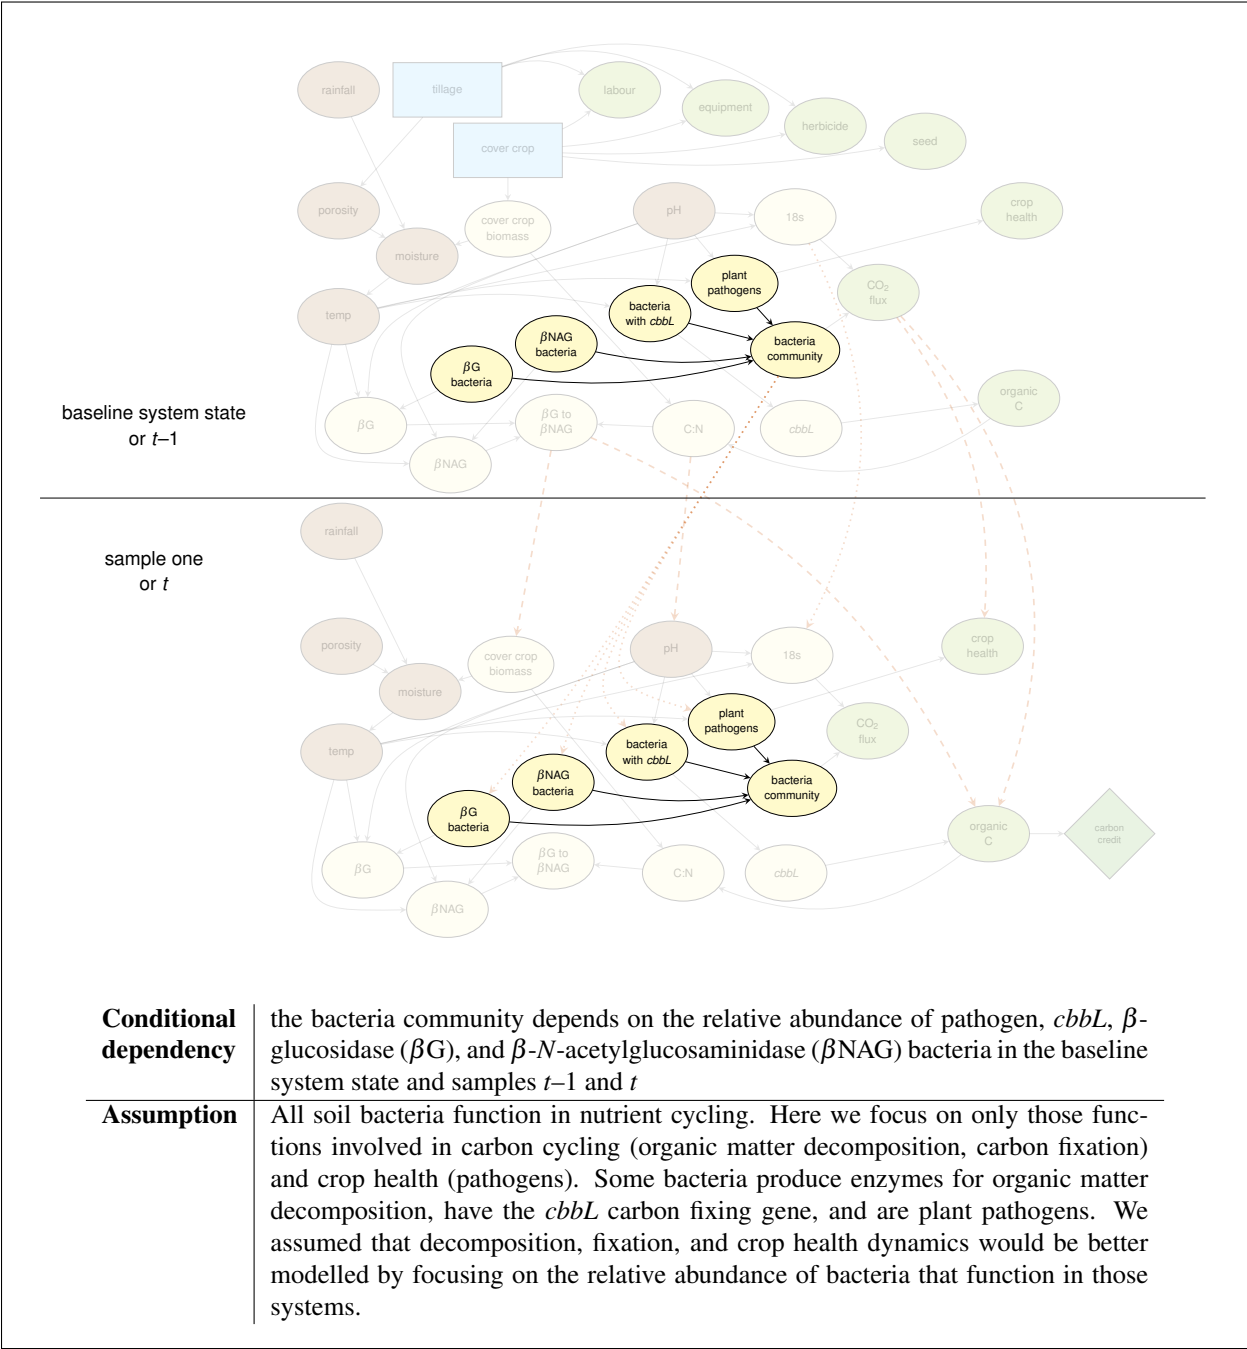

**Figure S2.2.g.** Trends and possible mechanisms underlying conditional dependencies in the conceptual BDN linking tillage and cover crop actions to net yield utility (crop health) and carbon credit utility from SOC storage. *continued*

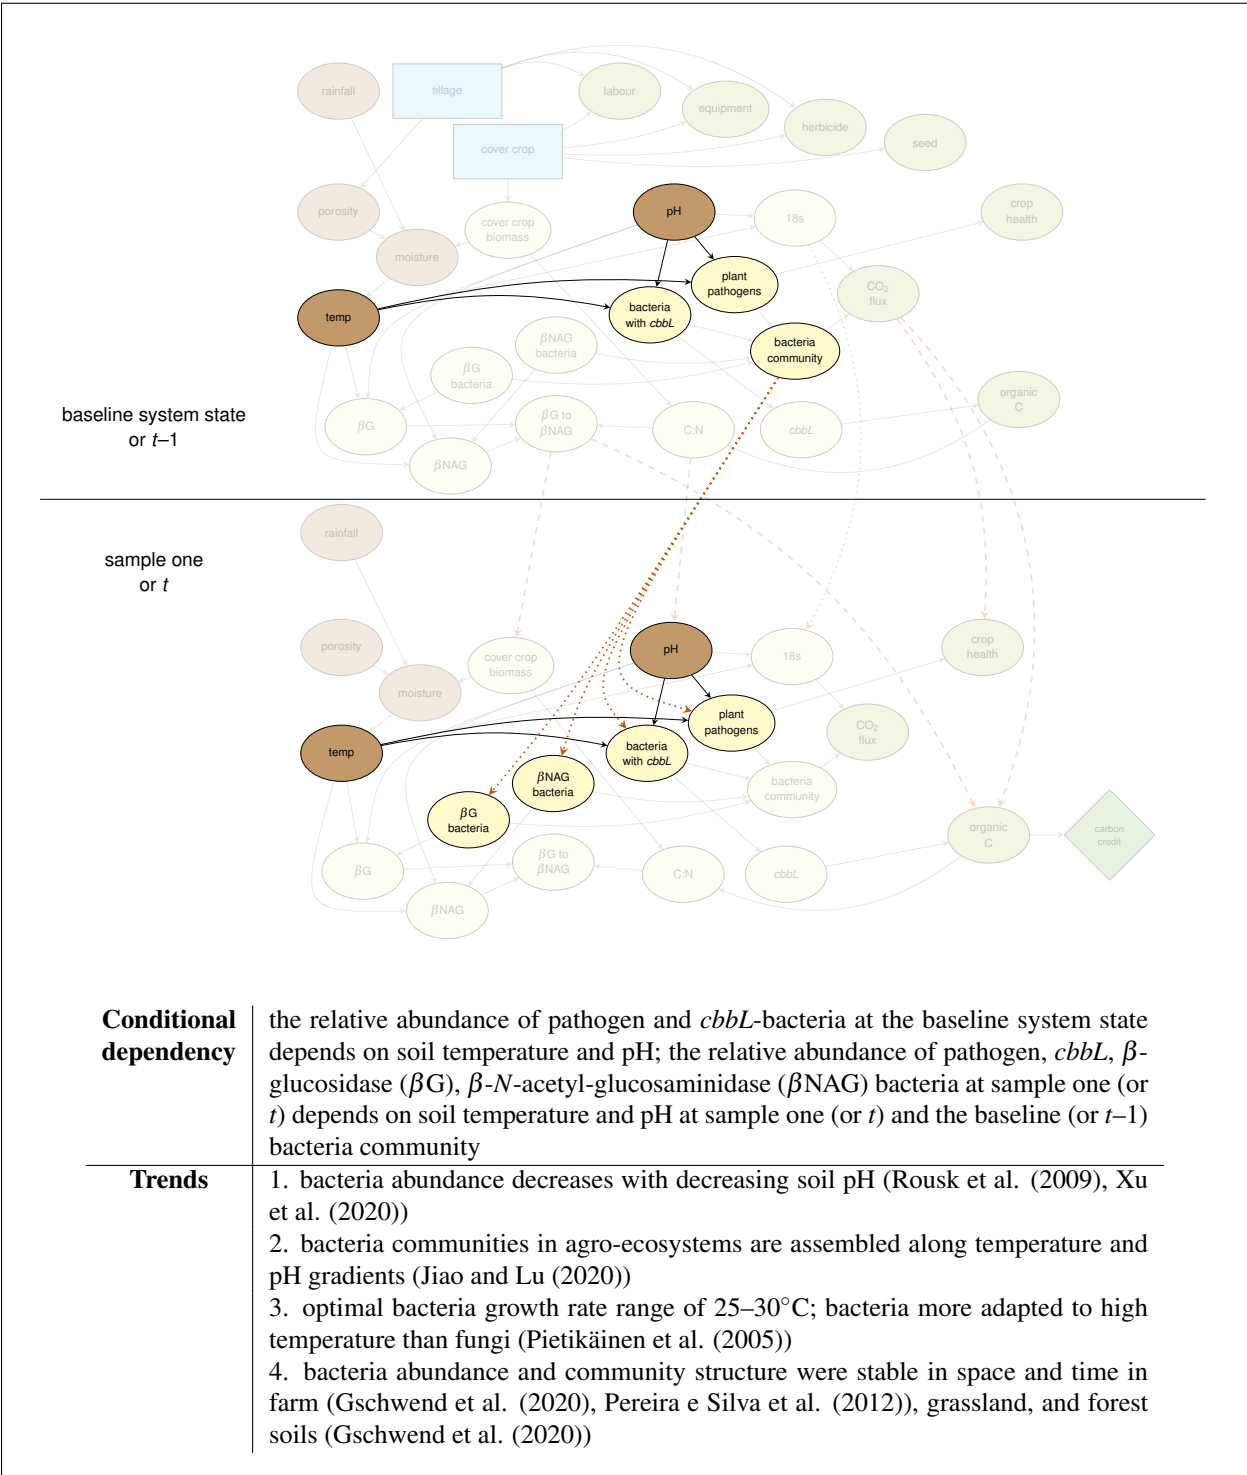

**Figure S2.2.h.** Trends and possible mechanisms underlying conditional dependencies in the conceptual BDN linking tillage and cover crop actions to net yield utility (crop health) and carbon credit utility from SOC storage. *continued*

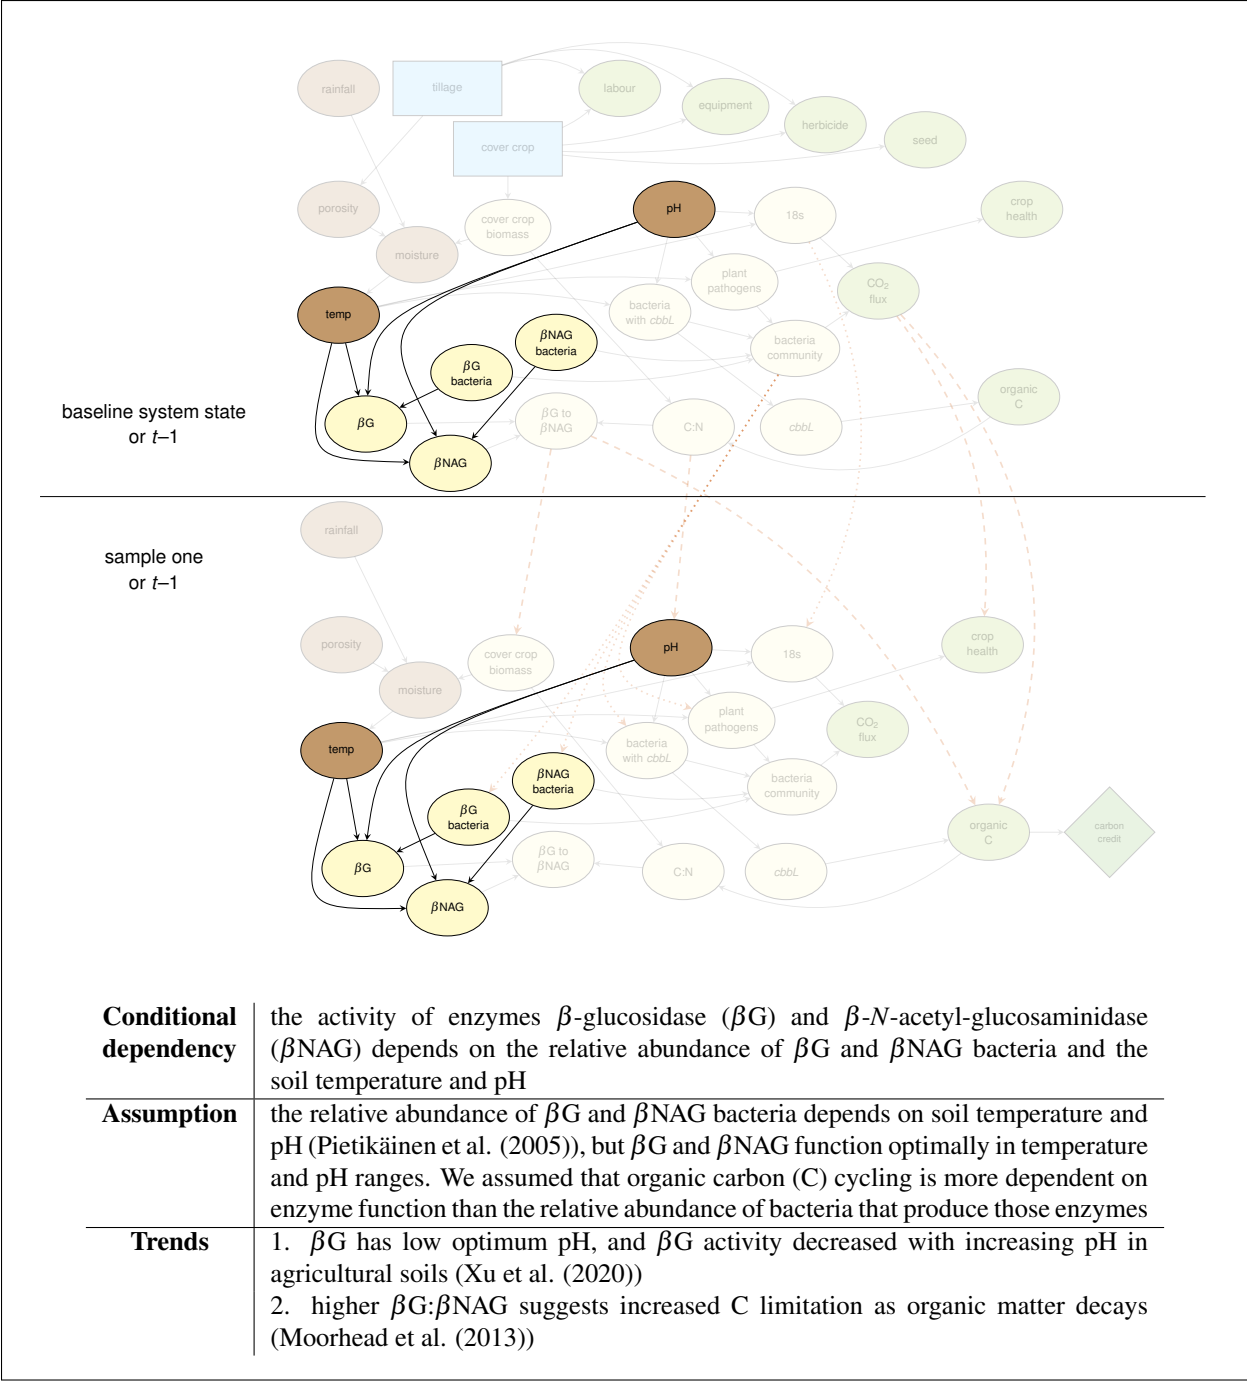

**Figure S2.2.i.** Trends and possible mechanisms underlying conditional dependencies in the conceptual BDN linking tillage and cover crop actions to net yield utility (crop health) and carbon credit utility from SOC storage. *continued*

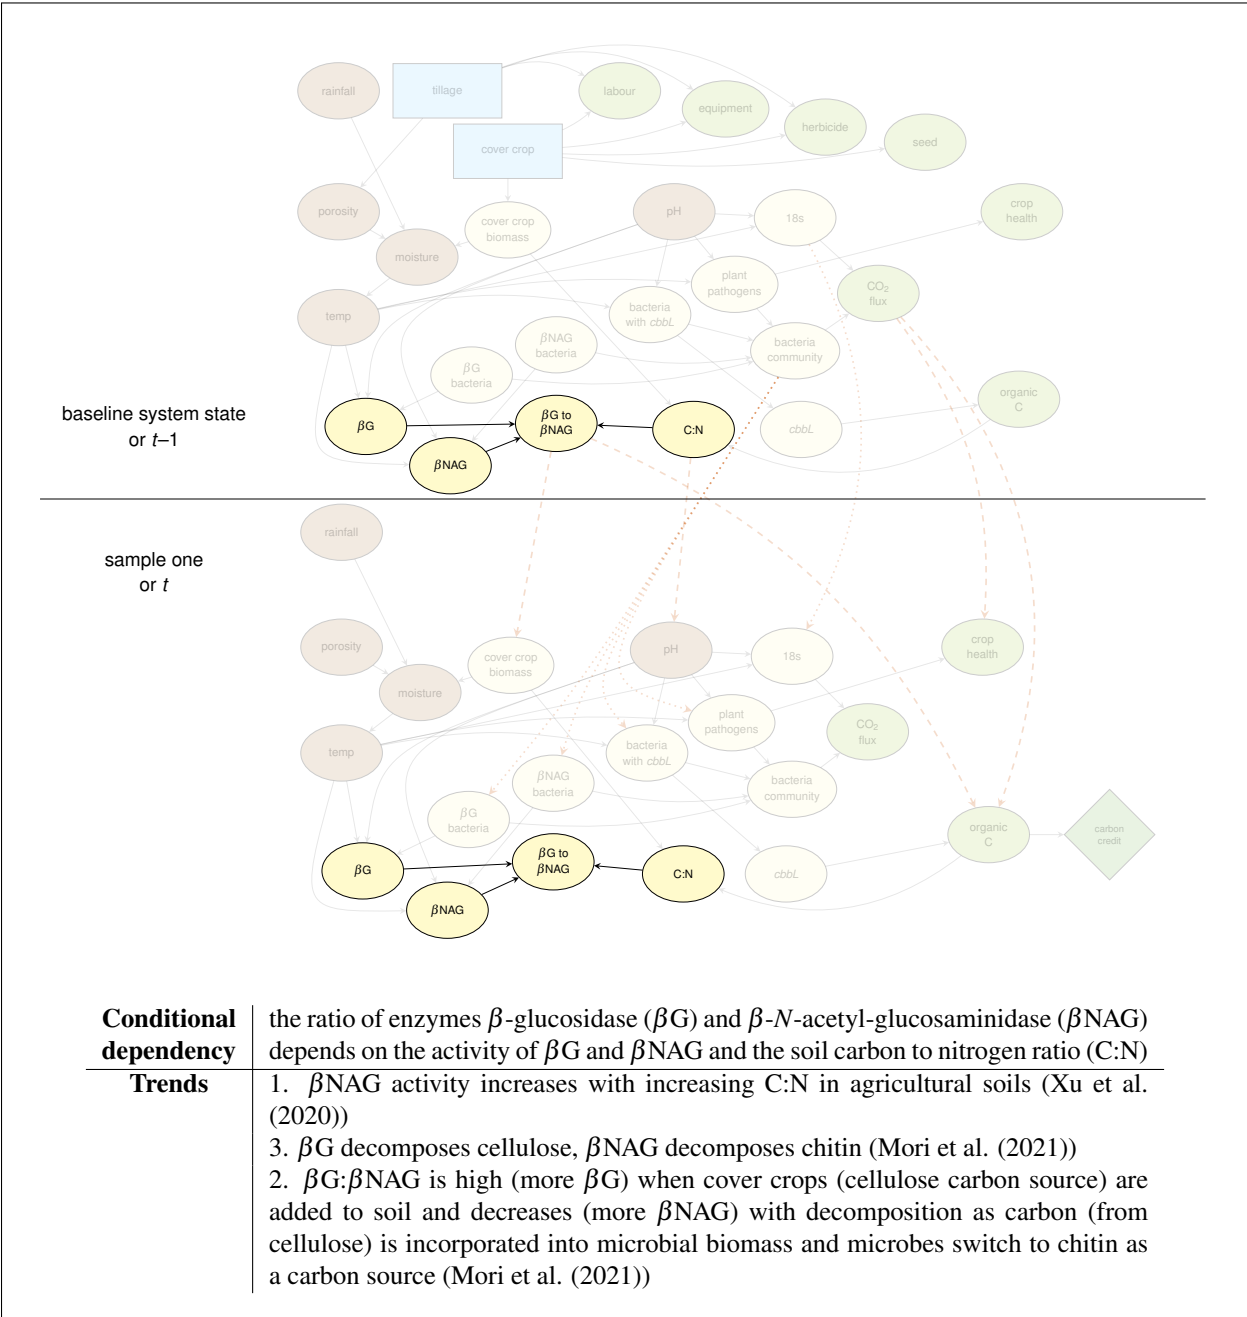

**Figure S2.2.j.** Trends and possible mechanisms underlying conditional dependencies in the conceptual BDN linking tillage and cover crop actions to net yield utility (crop health) and carbon credit utility from SOC storage. *continued*

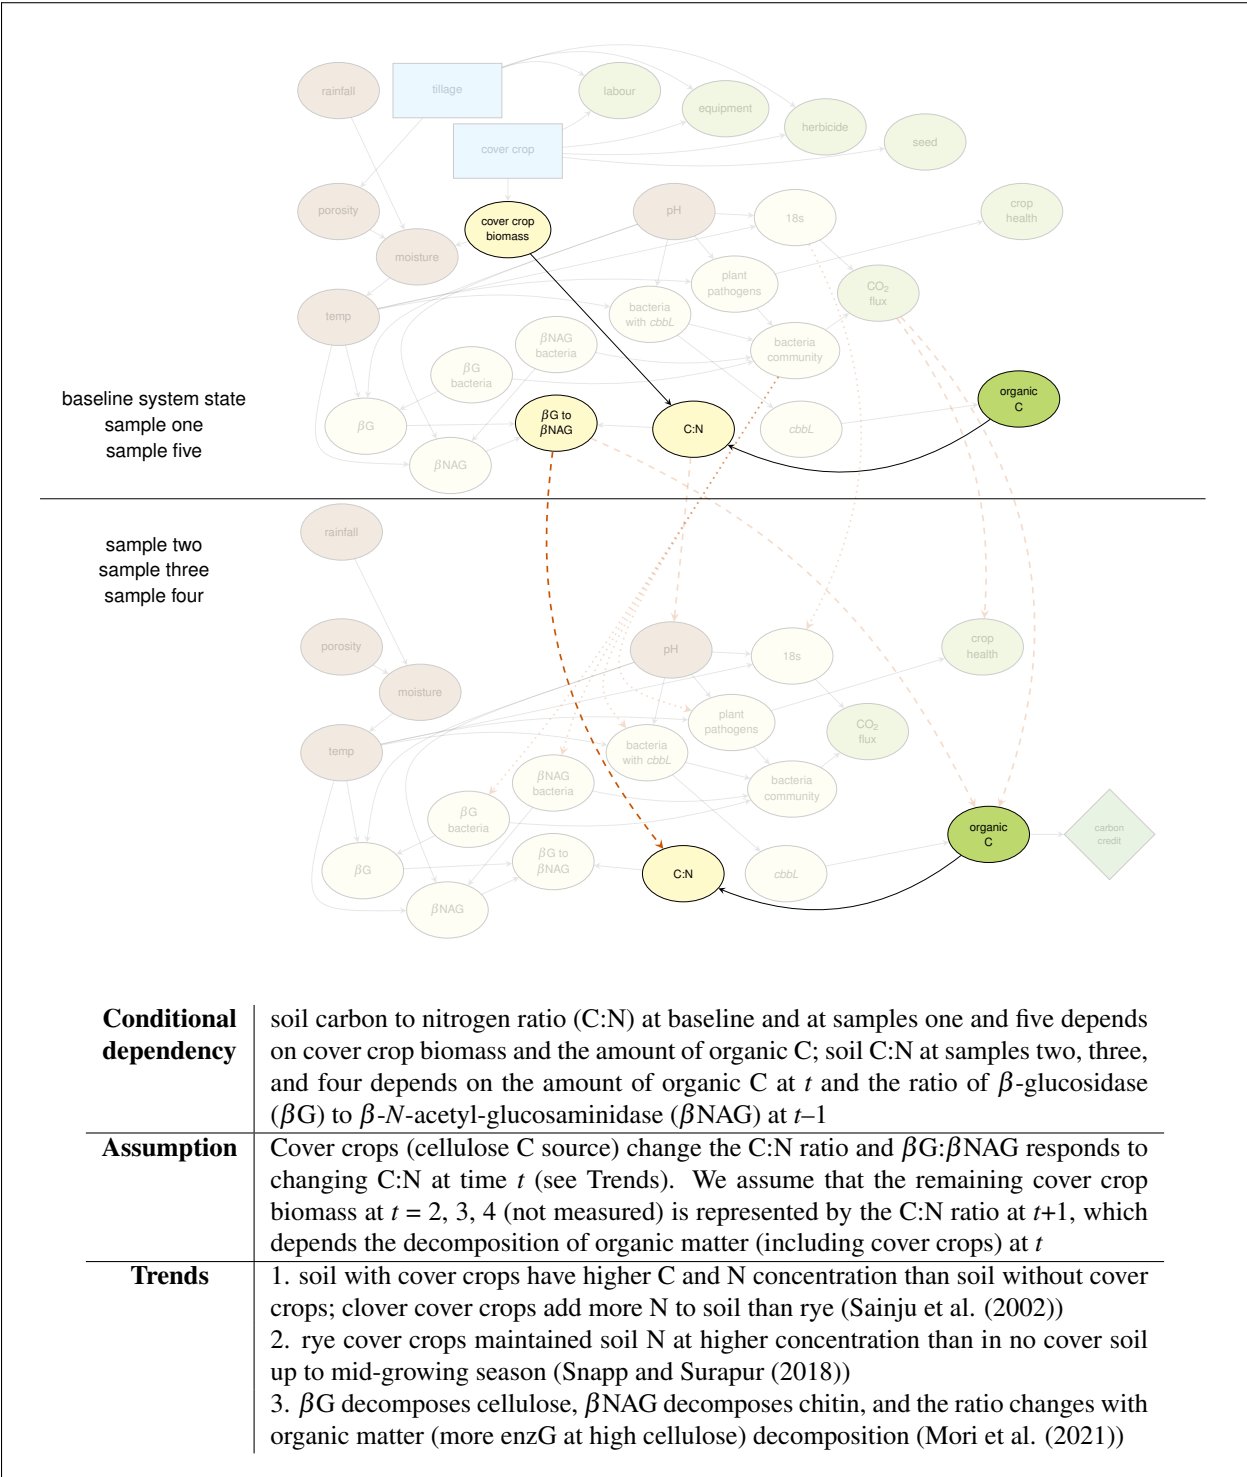

**Figure S2.2.k.** Trends and possible mechanisms underlying conditional dependencies in the conceptual BDN linking tillage and cover crop actions to net yield utility (crop health) and carbon credit utility from SOC storage. *continued*

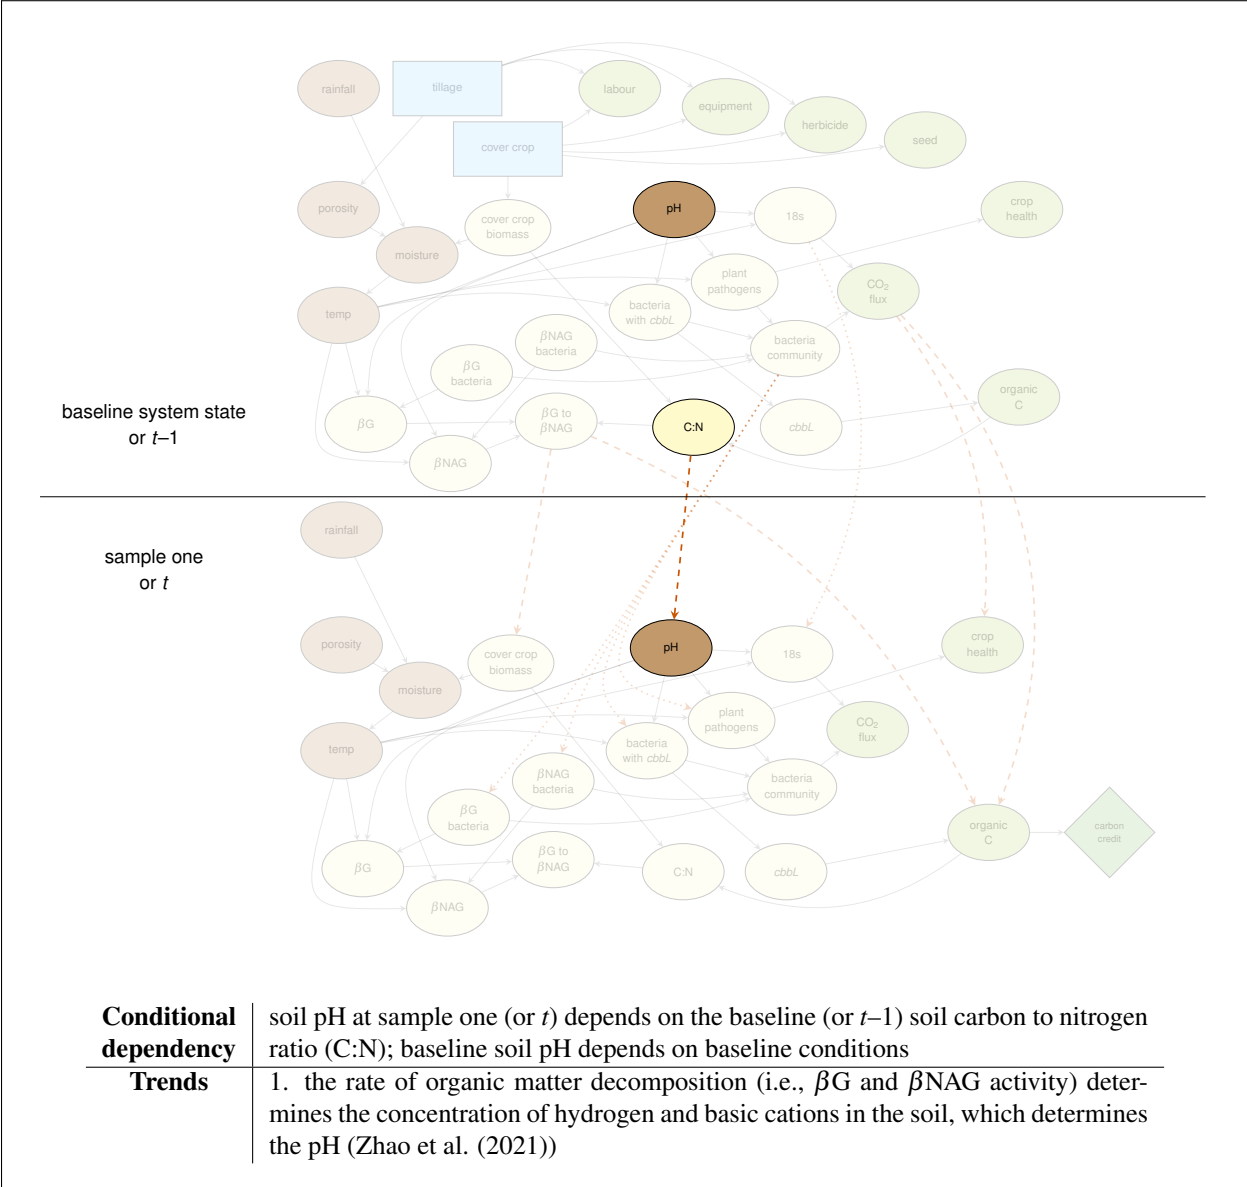

**Figure S2.2.1.** Trends and possible mechanisms underlying conditional dependencies in the conceptual BDN linking tillage and cover crop actions to net yield utility (crop health) and carbon credit utility from SOC storage. *continued*

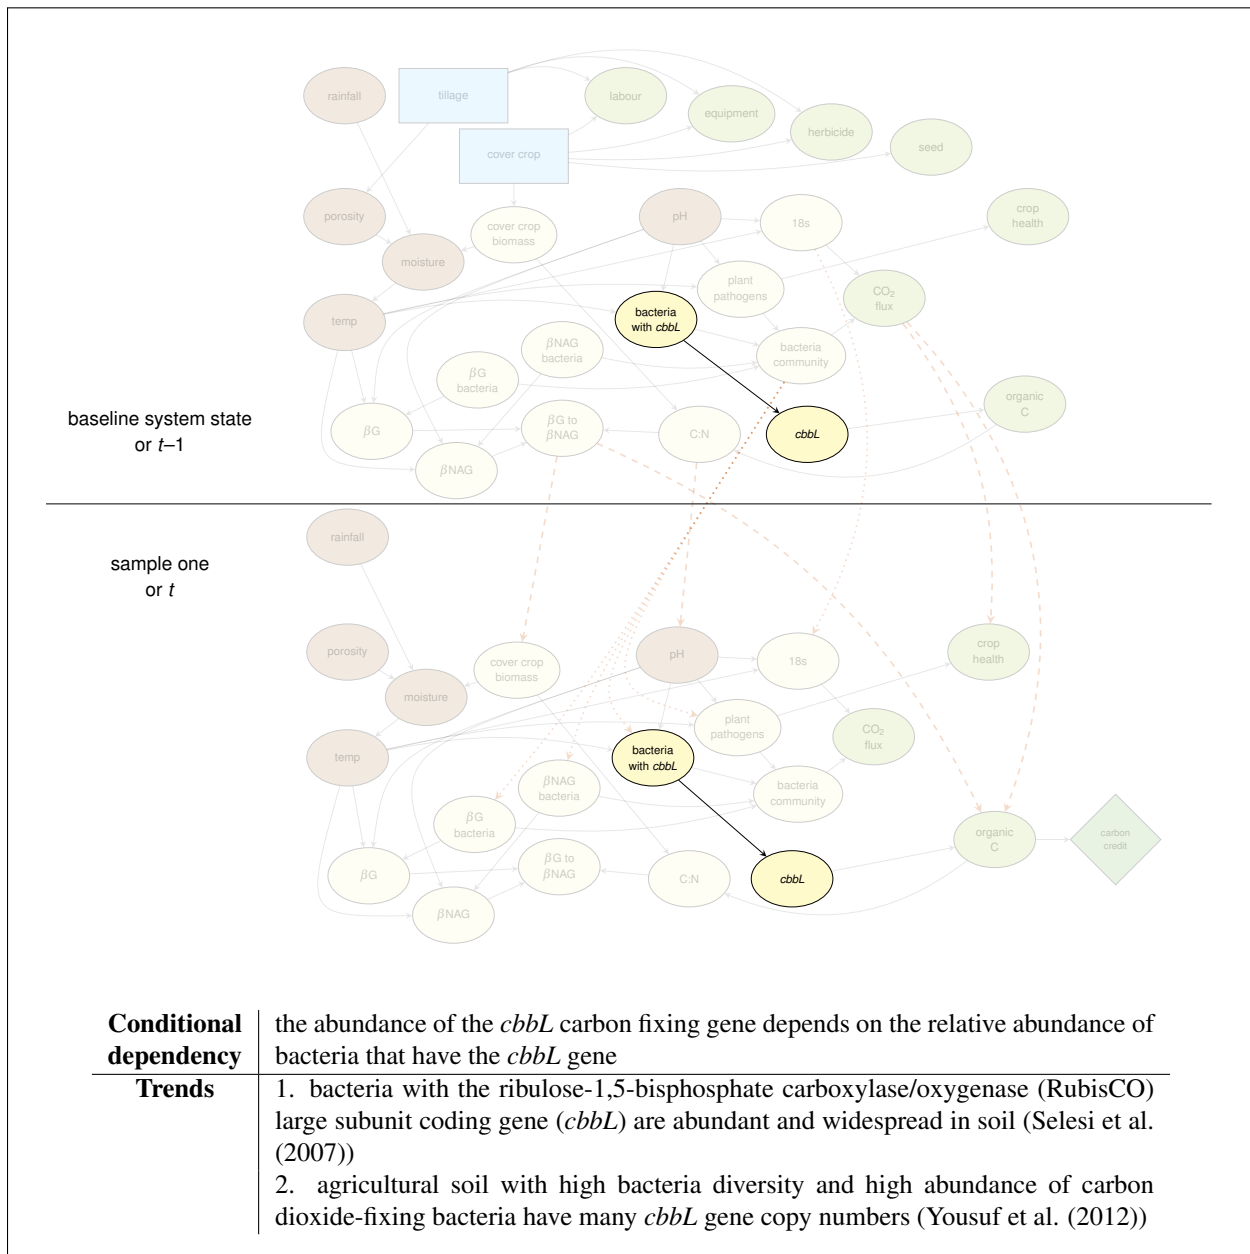

**Figure S2.2.m.** Trends and possible mechanisms underlying conditional dependencies in the conceptual BDN linking tillage and cover crop actions to net yield utility (crop health) and carbon credit utility from SOC storage. *continued*

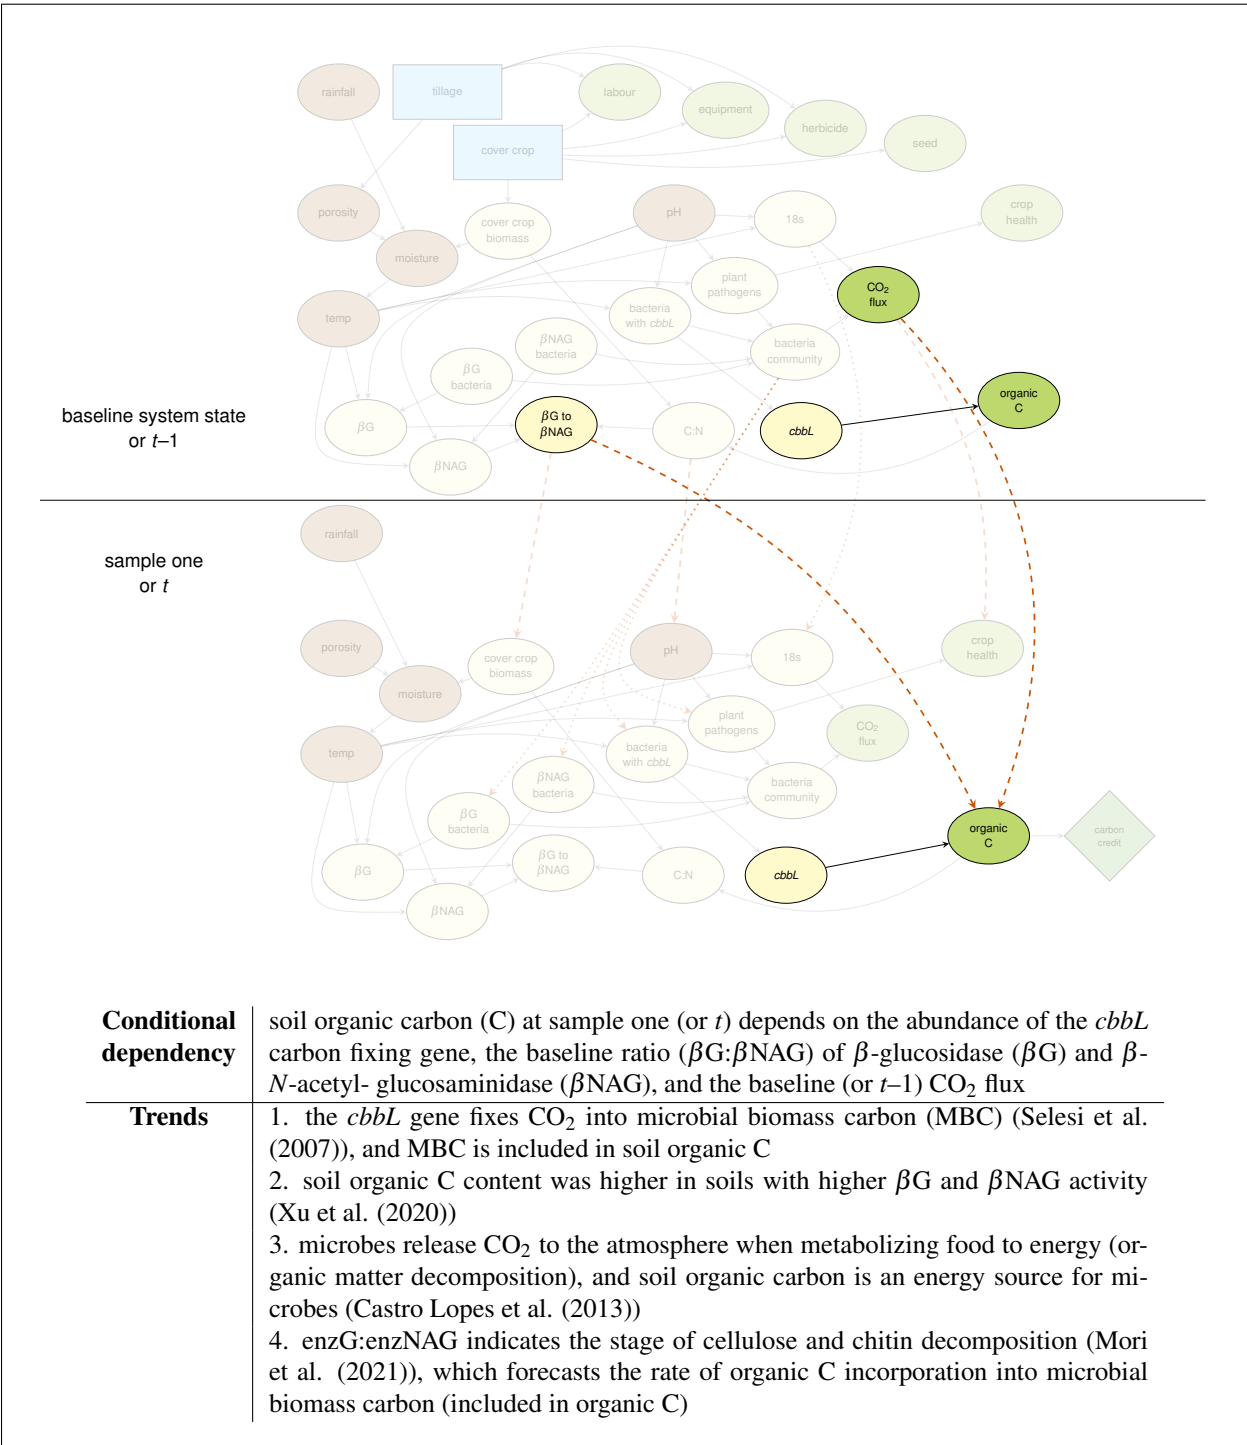

**Figure S2.2.n.** Trends and possible mechanisms underlying conditional dependencies in the conceptual BDN linking tillage and cover crop actions to net yield utility (crop health) and carbon credit utility from SOC storage. *continued*

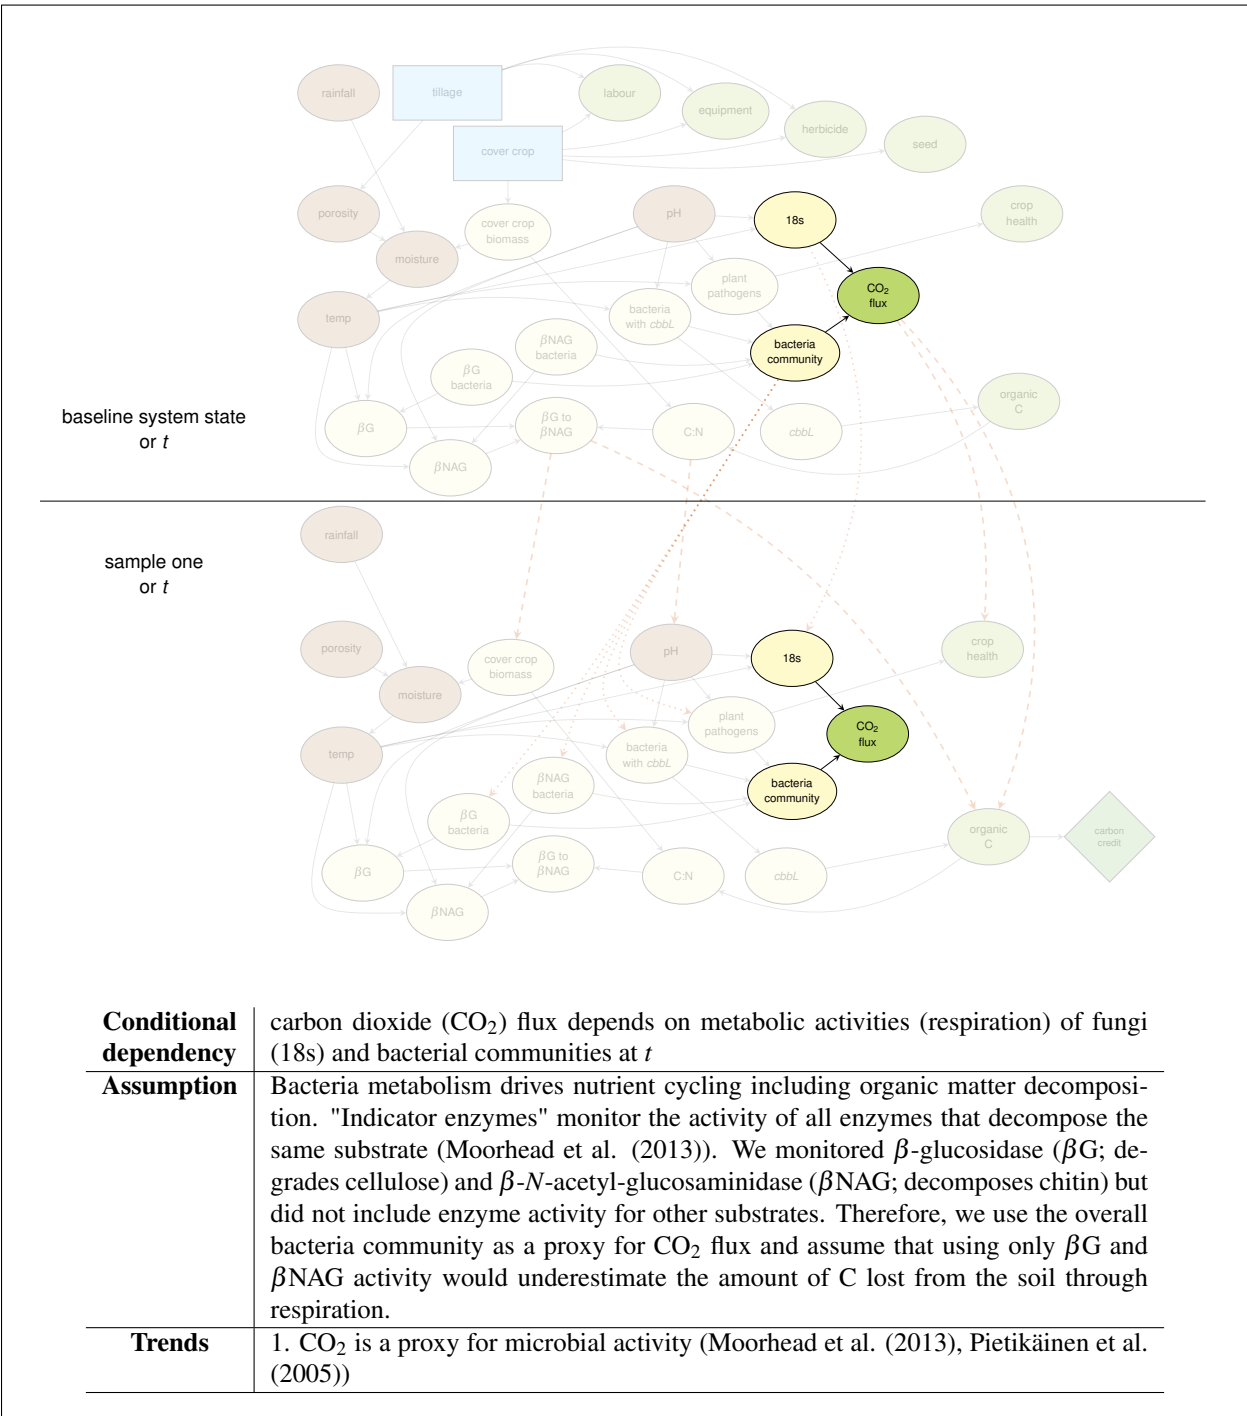

**Figure S2.2.o.** Trends and possible mechanisms underlying conditional dependencies in the conceptual BDN linking tillage and cover crop actions to net yield utility (crop health) and carbon credit utility from SOC storage. *continued*

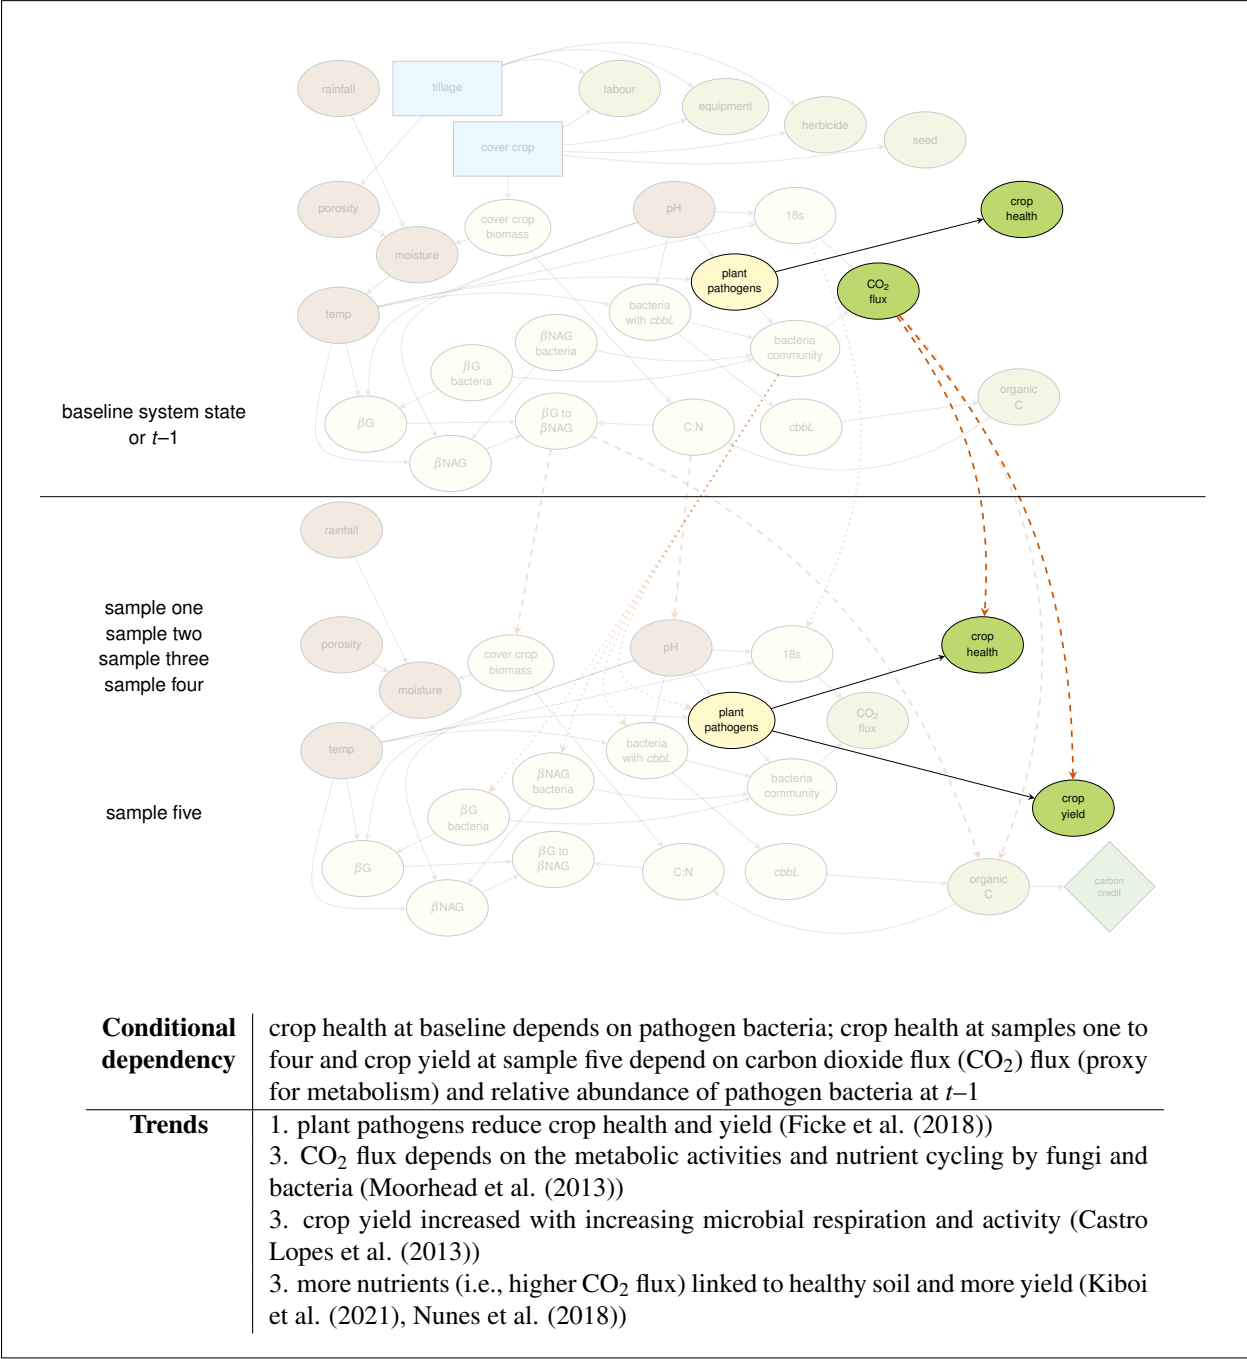

**Figure S2.2.p.** Trends and possible mechanisms underlying conditional dependencies in the conceptual BDN linking tillage and cover crop actions to net yield utility (crop health) and carbon credit utility from SOC storage. *continued*

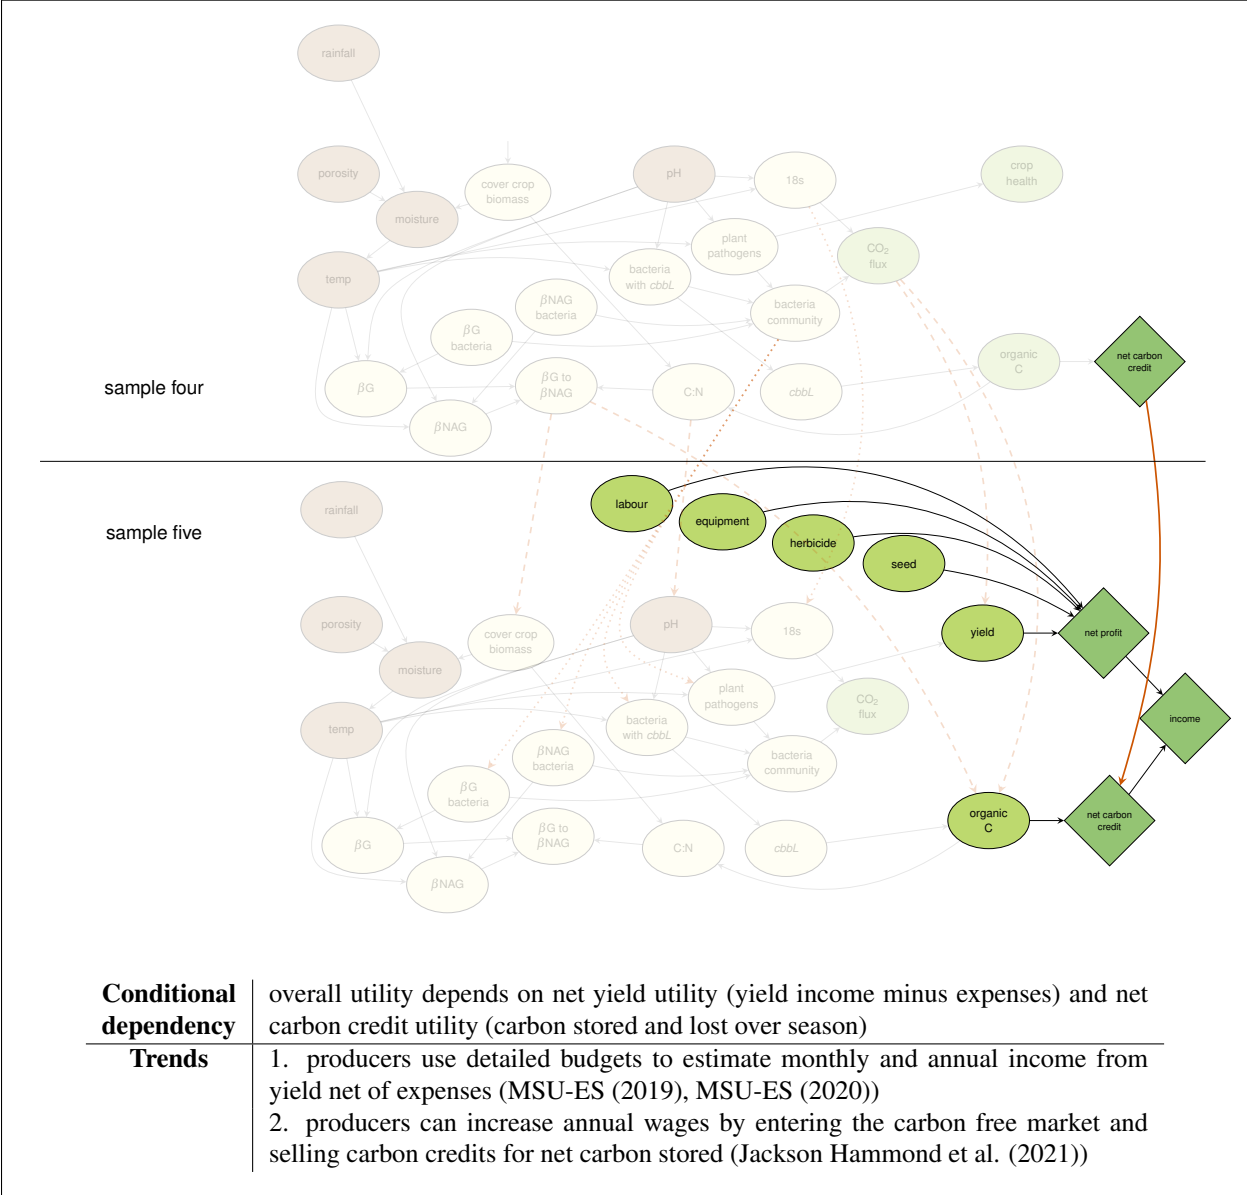

**Figure S2.2.q.** Trends and possible mechanisms underlying conditional dependencies in the conceptual BDN linking tillage and cover crop actions to net yield utility (crop health) and carbon credit utility from SOC storage. *continued*

## Literature cited

- Acharya BS, Dodla S, Gaston LA, Darapuneni M, Wang JJ, Sepat S, Bohara H (2019) Winter cover crops effect on soil moisture and soybean growth and yield under different tillage systems. *Soil & Tillage Research* 195:104430.
- Al-Kayssi AW, Al-Karaghoul AA, Hasson AM, Beker SA (1990) Influence of soil moisture content on soil temperature and heat storage under greenhouse conditions. *Journal of Agricultural Engineering Research* 45:241–252.
- Castro Lopes AA de, Sousa DMG de, Chaer GM, Reis Junior FB dos, Goedert WJ, Carvalho Mendes I de (2013) Interpretation of microbial soil indicators as a function of crop yield and organic carbon. *Soil Science Society of America Journal* 77:461–472.
- Falconer L, Riley JM, Williams B (2016) *Custom Rates for Farm and Ranch Services in Mississippi* (Agricultural Communications).
- Ficke A, C. C, Bergstrom G, Brodal G (2018) Understanding yield losses and pathogen biology to improve disease management: septoria nodorum blotch - a case study in wheat. *Plant Disease* 102:696–707.
- Gabriel JL, García-González I, Quemada M, Martin-Lammerding D, Alonso-Ayuso M, Hontoria C (2021) Cover crops reduce soil resistance to penetration by preserving soil surface water content. *Geoderma* 386:114911.
- Gschwend F, Hartmann M, Hug A-S, Enkerli J, Gubler A, Frey B, Meuli RG, Widmer F (2020) Long-term stability of soil bacterial and fungal community structures revealed in their abundance and rare fractions. *Molecular Ecology* 30:4305–4320.
- Jackson Hammond AA, Motew M, Brummitt CD, DuBuisson ML, Pinjuv G, Harburg DV, Campbell EE, Kumar AA (2021) Implementing the soil enrichment protocol at scale: opportunities for an agricultural carbon market. *Frontiers in Climate* 3:686440.
- Jiao S, Lu Y (2020) Soil pH and temperature regulate assembly processes of abundant and rare bacterial communities in agricultural ecosystems. *Environmental Microbiology* 23(3):1052–1065.
- Kiboi MN, Ngetich FK, Mucheru-Muna MW, Diels J, Mugendi DN (2021) Soil nutrients and crop yield response to conservation-effective management practices in the sub-humid highlands agro-ecologies of Kenya. *Heliyon* 7:e07156.
- Lakshmi V, Jackson TJ, Zehrfuhs D (2003) Soil moisture–temperature relationships: results from two field experiments. *Hydrological Processes* 17:3041–3057.
- Lipiec J, Kuś J, Slowińska-Jurkiewicz A, Nosalewicz A (2006) Soil porosity and water infiltration as influenced by tillage methods. *Soil & Tillage Research* 89:201–220.
- Moorhead DL, Rinkes ZL, Sinsabaugh RL, Weintraub MN (2013) Dynamic relationships between microbial biomass, respiration, inorganic nutrients and enzyme activities: informing enzyme-based decomposition models. *Frontiers in Microbiology* 4:223.
- Mori T, Aoyagi R, Kitayama K, Mo J (2021) Does the ratio of  $\beta$ -1,4-glucosidase to  $\beta$ -1,4-N-acetylglucosaminidase indicate the relative resource allocation of soil microbes to C and N acquisition? *Soil Biology and Biochemistry* 108363:160.
- MSU-ES (2019) *Soybeans 2019 planning budgets* (Mississippi State University Extension Services, Department of Agricultural Economics).
- MSU-ES (2020) *Soybeans 2020 planning budgets* (Mississippi State University Extension Services, Department of Agricultural Economics).
- Nunes MR, Es HM van, Schindelbeck R, Ristow AJ, Ryan M (2018) No-till and cropping system diversification improve soil health and crop yield. *Geoderma* 30–43:328.
- Onwuka B, Mang B (2018) Effects of soil temperature on some soil properties and plant growth. *Advances in Plants & Agriculture Research* 8(1):34–37.
- Pagliai M, De Nobili M (1993) Relationships between soil porosity, root development and soil enzyme activity in cultivated soils. *Geoderma* 56:243–256.
- Pereira e Silva MC, Dias ACF, Elsas JD van, Salles JF (2012) Spatial and temporal variation of archaeal, bacteria and fungal communities in agricultural soils. *PLoS ONE* 7(12):e51554.
- Pietikäinen J, Pettersson M, Bååth E (2005) Comparison of temperature effects on soil respiration and bacterial and fungal growth rates. *FEMS Microbiology Ecology* 52:49–58.
- Rousk J, Brookes PC, Bååth E (2009) Contrasting soil pH effects on fungal and bacterial growth suggest functional redundancy in carbon mineralization. *Applied and Environmental Microbiology* 75(6):1589–1596.
- Sainju UM, Singh BP, Whitehead WF (2002) Long-term effects of tillage, cover crops, and nitrogen fertilization on organic carbon and nitrogen concentrations in sandy loam soils in Georgia, USA. *Soil & Tillage Research* 63:167–

179.

- Sasal MC, Andriulo AE, Taboada MA (2006) Soil porosity characteristics and water movement under zero tillage in silty soils in Argentinian Pampas. *Soil & Tillage Research* 87:9–18.
- Selesi D, Pattis I, Schmid M, Kandeler E, Hartmann A (2007) Quantification of bacterial RubisCO genes in soils by *cbbL* targeted real-time PCR. *Journal of Microbiological Methods* 69(3):497–503.
- Snapp S, Surapur S (2018) Rye cover crop retains nitrogen and doesn't reduce corn yields. *Soil & Tillage Research* 180:107–115.
- USDA-NRCS (2021) *Plant materials technical note 103: Cover crop mix, seed cost, and seeding rate calculator for field staff* (United States Department of Agriculture Natural Resources Conservation Service, Jamie L. Whitten Plant Materials Center, Coffeeville, Mississippi).
- Xu Z, Zhang T, Wang S, Wang Z (2020) Soil pH and C/N ratio determines spatial variations in soil microbial communities and enzymatic activities of the agricultural ecosystems in Northeast China: Jilin Province case. *Applied Soil Ecology* 103629:155.
- Yousuf B, Keshri J, A. M, Jha B (2012) Application of targeted metagenomics to explore abundance and diversity of CO<sub>2</sub>-fixing bacterial community using *cbbL* gene from the rhizosphere of *Archis hypogaea*. *Gene* 506:18–24.
- Zhang Z, Pan Z, Pan F, Zhang J, Han G, Huang N, Wang J, Pan Y, Wang Z, Peng R (2020) The change characteristics and interactions of soil moisture and temperature in the farmland in Wuchuan County, Inner Mongolia, China. *Atmosphere* 11:503.
- Zhao X, He C, Liu W-S, Liu W-X, Liu Q-Y, Bai W, Li L.-J., Lal R, Zhang H-L (2021) Responses of soil pH to no-till and the factors affecting it: A global meta-analysis. *Global Change Biology* 154–166:28.
